# Supplementary material
Source: PubMed Central journal article supplement (PMC3875621)
Supplement: NIHMS510965-supplement-01.pdf [file NIHMS510965-supplement-01.pdf]

# The 22q11.2 Deletion Syndrome as a Window into Complex Neuropsychiatric Disorders Over the Lifespan

## *Supplemental Information*

|                                                                                                                                                                                     |    |
|-------------------------------------------------------------------------------------------------------------------------------------------------------------------------------------|----|
| Immune Dysfunction in 22q11DS and Idiopathic Neuropsychiatric Disorders .....                                                                                                       | 2  |
| Psychiatric Symptom Trajectories in 22q11DS .....                                                                                                                                   | 3  |
| Cognitive Decline as a Risk Factor for Psychosis .....                                                                                                                              | 5  |
| Sources of Genetic Variability in 22q11DS: Breakpoint Variability .....                                                                                                             | 5  |
| Relevance of 22q11.2 Genes to Neural Endophenotypes in the General Population .....                                                                                                 | 6  |
| Loss versus Gain of Function Mutations: 22q11.2 Duplication Syndrome .....                                                                                                          | 7  |
| Figure S1. 22q11DS mouse models .....                                                                                                                                               | 8  |
| Table S1. Summary of evidence for the involvement of various sources of genetic variability on endophenotypic traits and behavior, organized by gene within the 22q11.2 locus ..... | 9  |
| Supplemental References .....                                                                                                                                                       | 12 |

## **Immune Dysfunction in 22q11DS and Idiopathic Neuropsychiatric Disorders**

One characteristic component of the 22q11DS phenotype is immunodeficiency, due to impaired T-cell production caused by thymic aplasia (i.e., complete absence of the thymus gland) or hypoplasia. Although complete thymic aplasia characterizes only about 1.5% of 22q11DS patients, the severity of immune deficits present is highly variable (1), and 77% of 22q11DS patients show some evidence of immunocompromise (2; 3). Sullivan *et al.* (3) found no evidence that the severity of immunocompromise was related to other physical phenotypic features of the illness (specifically, cardiac defects, hypocalcemia, or palate anomalies); however, to our knowledge no studies have yet investigated the relationship between immune function and psychopathology in 22q11DS.

Given emerging evidence suggesting that disruption of genes involved in immune function may be relevant to the etiology of both idiopathic autism (4; 5) and psychosis (6-8) this aspect of the 22q11DS phenotype warrants further study. For example, increased serum levels of pro-inflammatory cytokines and chemokines, differential expression of genes involved in inflammatory processes and altered T-cell function have been documented in patients with idiopathic schizophrenia (7). Microglia, the main producers of inflammatory cytokines, show increased activation in schizophrenia patients, which may be relevant to findings of accelerated gray matter loss near the time of illness onset (9). Effects of prenatal maternal infection on subsequent schizophrenia risk have also been extensively documented (e.g., (10)). Genetic variants involved in immunologic function also appear relevant to the etiology of idiopathic schizophrenia, as a recent, very large-scale genome-wide association (GWAS) study highlighted the involvement of the major histocompatibility complex (MHC) in schizophrenia risk (11). Similarly, B- and T-cell dysfunction have also been implicated in idiopathic autism, and viral

infection during pregnancy also elevates risk for the development of autism spectrum disorder (ASD) (4; 5). Although the direct connection between psychiatric illness and immunodeficiency in 22q11DS has not yet been made, the high rate of immunodeficiency associated with the disorder suggests that immune system dysregulation may be relevant to the dramatically increased risk of neuropsychiatric disorder, particularly ASD and psychosis, in patients with 22q11DS.

### **Psychiatric Symptom Trajectories in 22q11DS**

As noted in “Developmental Trajectories of Neuropsychiatric Phenotypes” section of the main text and Figure 2A, psychiatric manifestations of 22q11DS involve social and affective disruptions that cut across traditional diagnostic categories. As such, categorical classification systems may not adequately capture the full range of 22q11DS-associated symptomatology (12). Four domains are of particular interest as their features persist developmentally and may predict later psychiatric morbidity: 1) attention/executive function deficits (13; 14); 2) social-cognitive deficits (15; 16); 3) anxiety and mood dysregulation (13; 17; 18); and 4) subthreshold psychotic symptoms (18; 19). In a longitudinal study, one-third of 22q11DS youth who met criteria for an attention-deficit/hyperactivity disorder (ADHD) diagnosis in childhood no longer met diagnostic criteria at follow-up three years later (13). However, deficits in attention and executive function (assessed dimensionally via parent report and neurocognitive assessments) are pervasive in 22q11DS, are associated with poorer social skills in children with the disorder (20) and also predict prodromal symptoms of psychosis in adolescence (13). In fact, Antshel and colleagues (13) found that parent ratings of childhood odd/eccentric symptoms and number of errors on the Wisconsin Card Sort Test, a classic executive function measure, were the two best predictors of

adolescent prodromal symptoms, with a very low false positive rate. Regarding domain (2), performance on social cognition tasks (i.e. Theory of Mind tasks) has been associated with poorer social competence (21) and impairments in reciprocal social behavior (22) in children with 22q11DS, suggesting that abnormal development of social-cognitive skills has significant implications for real-world functioning. Social cognitive deficits are a fundamental aspect of idiopathic schizophrenia, and performance on Theory of Mind tasks differentiated 22q11DS adults with a schizophrenia diagnosis from those without schizophrenia (23). Furthermore, we recently found that Theory of Mind performance was the best predictor of positive symptoms in adolescents with 22qDS, accounting for 39% of the variance in symptom severity (15). Thus, social cognitive deficits appear pervasive across diagnostic categories in 22q11DS youth.

Symptoms of anxiety are present from early childhood in 22q11DS, with diagnoses of specific phobia and separation anxiety disorder present in almost half of children with the disorder (13). Mood symptoms tend to peak in adolescence and then level off, whereas anxiety symptoms remain prevalent in adults, most commonly evolving into clinical diagnoses of generalized anxiety disorder (24; 25). In one of the very few existing longitudinal studies, Gothelf *et al.* (26) found that subthreshold psychotic symptoms at baseline interacted with COMT genotype and baseline symptoms of anxiety/depression to predict 61% of the variance in psychotic symptom severity at follow-up, suggesting that severity of affective disruption may be predictive of subsequent psychosis risk in 22q11DS. Psychotic symptoms that do not meet criteria for a clinical diagnosis of overt psychotic disorder are present in 28- 57% of adolescents with 22q11DS (27; 28), suggesting that the evolution of psychotic disorders in 22q11DS is a protracted process, manifesting in childhood in the form of subthreshold symptoms of unusual thought content and/or hallucinations, as well as internalizing symptoms (26). The presence of

the 22q11.2 mutation may present a sensitized background, in which increased stress can precipitate the development of fully psychotic symptoms (29). It is not yet known whether early interventions focused on improving social–cognitive functioning and/or stress reduction techniques would reduce risk for subsequent psychopathology; this is a key area for future investigation.

### **Cognitive Decline as a Risk Factor for Psychosis**

Cognitive deterioration in adolescence is a dynamic phenotype that may index psychosis risk in 22q11DS. Two studies have reported that verbal IQ decline over a 3-5 year period was associated with psychotic symptoms at follow-up (26; 30) as well as greater reduction of left cortical gray matter volume over time (26). Moreover, 30% of prospectively followed 22q11DS children display a decrease in IQ over time not only relative to population norms, but also an *absolute* decline in cognitive abilities (31). These findings are consistent with epidemiologic studies of schizophrenia risk in the general population, suggesting that a combination of static and progressive cognitive deficits across early adolescence may characterize individuals at greatest risk for development of psychosis (32).

### **Sources of Genetic Variability in 22q11DS: Breakpoint Variability**

Breakpoint variability may impact gene expression via inclusion or exclusion of specific genes in low copy repeat (LCR) regions. As discussed in the “Epistatic Interactions: *COMT* and *PRODH*” section of the main text, genetic knockout studies in mice show that reduced dosage of specific genes within the locus can substantially impact phenotypes (33; 34). While many of the gene-related sequences within LCRs appear to be either non-functional

pseudogenes or truncated parts of original genes, several functional genes lie within the LCRs in the 22q11.2 locus, including proline dehydrogenase (*PRODH*), *DGCR6*, and *ISG43* (35). Determining where within the LCRs the breakpoints occur may elucidate whether these particular sequences contribute to phenotypic variation; this is a key question requiring further study in large samples.

Notably, while diagnosis of 22q11.2 deletion syndrome is made on the basis of a deletion within the 1.5 Mb DGCR, now that genome-wide microarray technology is increasingly used for clinical diagnosis, atypical deletions within this region may be more frequently identified (36-39). For example, point mutations within specific genes in the 22q11.2 locus such T-box 1 (*TBX1*) have recently been described (40).

### **Relevance of 22q11.2 Genes to Neural Endophenotypes in the General Population**

In the non-22q11DS population, Kempf *et al.* (41) identified functional variants in the *PRODH* gene that were associated with risk for schizophrenia, and then investigated effects of these variants on structural and functional MRI measures. Individuals with the schizophrenia risk haplotype had decreased striatal gray matter volume and increased subcortical-to-frontal functional connectivity during performance on a working memory task, whereas the opposite pattern was found in those with the protective haplotype. These findings suggest that genetic variation in *PRODH* is associated with schizophrenia risk in the general population, and these effects may be mediated via its effects on brain structure and function. Additional findings implicating genes within the 22q11.2 locus in psychosis susceptibility in the general population are detailed in **Table S1**.

### **Loss versus Gain of Function Mutations: 22q11.2 Duplication Syndrome**

The phenotype of 22q11.2 microduplication syndrome has not yet been well characterized, with the first case described in the late 1990s (42). The 22q11.2 microdeletion and duplication are mediated by the same mechanism: nonallelic homologous recombination between LCRs in the region (43). The duplication is estimated to occur at approximately half the rate of the deletion syndrome (44; 45). However, given that phenotypic manifestations are generally less severe than those of the reciprocal deletion (46), its prevalence may currently be under-estimated (43). Interestingly, there are high levels of both phenotypic and genetic variability in this syndrome: although most duplications contain 3 Mb, the duplication ranges from 1.5 to 6 Mb in length. While a significant number of patients with 22q11.2 microduplications have a normal or near normal phenotype, some associated features are also common to the 22q11.2 deletion, including heart defects, velopharyngeal insufficiency, and cognitive deficits, although the mild facial dysmorphic features are distinct from those of 22qDS (46). The neuropsychiatric phenotype includes ADHD, aggressive behaviors, and autism (47-49).

Genotype-phenotype investigations of 22q11.2 duplication syndrome may inform dosage effects related to genes within this locus, and their association with the variable phenotype. For example, recurrent reciprocal microdeletions and microduplications in Chromosome 1q21.1 are associated with features of microcephaly or macrocephaly, respectively (50).

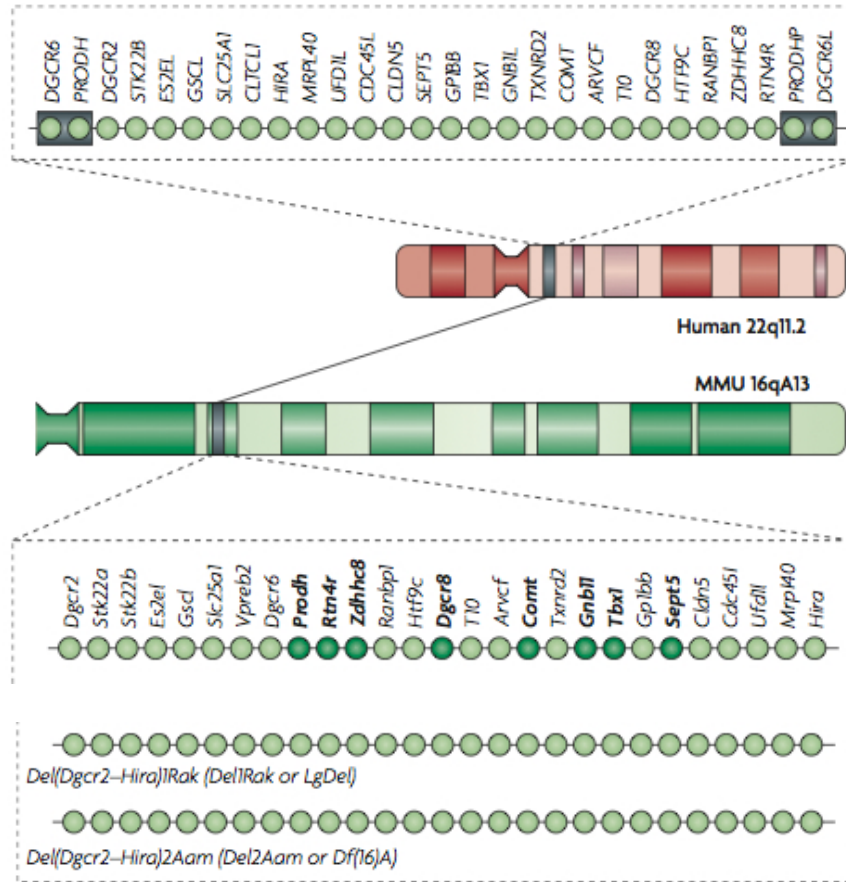

**Figure S1. 22q11DS mouse models.** As reviewed in Karayiorgou *et al.* (17), various mouse models for the 22q11.2 deletion syndrome have been developed. The two most commonly studied are the *LgDel* and *Df(16)<sup>+/-</sup>* models. *LgDel* has a hemizygous deletion spanning ~1.3 Mb and contains all but one of the human orthologous genes in the 1.5 Mb deletion region (also referred to as the *Del(Dgcr2-Hira)1Rak* mouse or *Del1Rak* (51)). The *Df(16)<sup>+/-</sup>* mouse has a hemizygous deletion syntenic to the human 1.5 Mb deletion, and is also referred to as the *Del(Dgcr2-Hira)2Aam* mouse (52). Single gene deletions within the 22q11.2 locus (e.g., *Prodh*, *Tbx1*, *Sept5*) are also utilized to probe the consequences of under-expression of specific genes within the locus (53). Mouse models have thus helped to clarify the contribution of specific genes versus oligogenic effects. Reprinted with permission from Karayiorgou *et al.* (2010).



**Table S1. Summary of evidence for the involvement of various sources of genetic variability on endophenotypic traits and behavior, organized by gene within the 22q11.2 locus\***

| Source of Genetic Variability            | Gene(s) in 22q11.2 Region | Effects on Brain Structure and Function in 22q11DS                                                                                                                                                                                                                        | Effects on Psychiatric Phenotype in 22q11DS                                                                                                                                                                                                                                      | Findings in Idiopathic Psychiatric Illness                                                                                                                                                                                                                                                                                                                               | Findings in Mouse Models                                                                          |
|------------------------------------------|---------------------------|---------------------------------------------------------------------------------------------------------------------------------------------------------------------------------------------------------------------------------------------------------------------------|----------------------------------------------------------------------------------------------------------------------------------------------------------------------------------------------------------------------------------------------------------------------------------|--------------------------------------------------------------------------------------------------------------------------------------------------------------------------------------------------------------------------------------------------------------------------------------------------------------------------------------------------------------------------|---------------------------------------------------------------------------------------------------|
| Haploinsufficiency/<br>Allelic Variation | <i>COMT</i>               | SNP rs4680 low-activity (Met) allele associated with decreased frontal lobe volume in adults (53) and more robust decrease in PFC volume and verbal IQ over time in adolescents (54); Met genotype also associated with better executive functioning in children (55; 56) | SNP rs4680 low-activity allele (Met) a risk factor for development of psychotic symptoms in youth (54); however, SNP rs4680 genotype was not associated with schizophrenia risk in adults (57); Low-activity allele (Met) associated with ADHD and (to a lesser extent) OCD (58) | SNP rs4680 high-activity allele (Val) is more often transmitted to probands with schizophrenia (59); however, (60) found no association of SNP rs4680 variants with schizophrenia; Relationship between this variant and ADHD diagnosis, although direction of association is mixed (61; 62); SNP rs4680 low-activity allele (Met) associated with diagnosis of OCD (63) | <i>Comt</i> deficiency resulted in region-specific changes in DA levels, particularly in PFC (64) |
|                                          | <i>PRODH</i>              | Inverse correlation between plasma proline level and IQ (65)                                                                                                                                                                                                              | rs372055'T' allele carriers (22qDS subjects) had significantly higher BPRS scores than developmental disability controls (54)                                                                                                                                                    | Screened 6 SNPs: <i>PRODH</i> *1945 T->C, <i>PRODH</i> *1852 G->A showed significant association with schizophrenia (66)                                                                                                                                                                                                                                                 | Overexpression of <i>Prodh</i> led to increased PPI (67)                                          |
|                                          | <i>PIK4CA</i>             |                                                                                                                                                                                                                                                                           | Screened 3 SNPs; significant association with SNP rs165793-G and schizophrenia (68; 69); No relationship between SNP rs165793-G and schizophrenia (70)                                                                                                                           | Significant association with SNP rs165793-G and schizophrenia (69)                                                                                                                                                                                                                                                                                                       |                                                                                                   |

| Source of Genetic Variability | Gene(s) in 22q11.2 Region | Effects on Brain Structure and Function in 22q11DS | Effects on Psychiatric Phenotype in 22q11DS | Findings in Idiopathic Psychiatric Illness                                                                                                                                                                                              | Findings in Mouse Models                                                                                                                                                                                                   |
|-------------------------------|---------------------------|----------------------------------------------------|---------------------------------------------|-----------------------------------------------------------------------------------------------------------------------------------------------------------------------------------------------------------------------------------------|----------------------------------------------------------------------------------------------------------------------------------------------------------------------------------------------------------------------------|
|                               | <i>GNB1L</i>              |                                                    |                                             | SNPs rs5746832 and rs2269726 showed significant association with psychosis (71)                                                                                                                                                         | <i>Gnb1l</i> -deficient mice show PPI deficits (71)                                                                                                                                                                        |
|                               | <i>DGCR2</i>              |                                                    |                                             | DGCR2 protein expression elevated in DLPFC of schizophrenia patients; risk allele of a coding SNP associated with schizophrenia was associated with reduced expression of DGCR2 (73)                                                    |                                                                                                                                                                                                                            |
|                               | <i>TBX1</i>               |                                                    |                                             | Inactivating mutations lead to increased risk of autism (72)                                                                                                                                                                            | <i>Tbx1</i> -deficient mice show PPI deficits (72); Homozygous <i>Tbx1</i> mutants, the distribution of neural-crest-derived cells was disrupted, and the migration pathways of cranial nerves (IX & X) were abnormal (74) |
|                               | <i>ZDHHC8</i>             |                                                    |                                             | ZDHHC8 rs175174 GG-genotype carriers had gray matter reduction in frontal lobe and increased gray matter posterior volume compared to A-allele carriers (75); SNP rs175174 (A/G) showed significant association with schizophrenia (76) | <i>Zdhhc8</i> -deficient mice show decreased density of dendritic spines and glutamatergic synapses (77)                                                                                                                   |

| Source of Genetic Variability | Gene(s) in 22q11.2 Region | Effects on Brain Structure and Function in 22q11DS                                                                                                                                                                                                                                                                               | Effects on Psychiatric Phenotype in 22q11DS                                                                                       | Findings in Idiopathic Psychiatric Illness                                                                                                     | Findings in Mouse Models                                                                                                                                                                                                                                                                                                                                                          |
|-------------------------------|---------------------------|----------------------------------------------------------------------------------------------------------------------------------------------------------------------------------------------------------------------------------------------------------------------------------------------------------------------------------|-----------------------------------------------------------------------------------------------------------------------------------|------------------------------------------------------------------------------------------------------------------------------------------------|-----------------------------------------------------------------------------------------------------------------------------------------------------------------------------------------------------------------------------------------------------------------------------------------------------------------------------------------------------------------------------------|
| microRNA Disruption           | <i>DGCR8</i>              | Family-based association study of schizophrenia in 22q11DS identified statistically significant enrichment (12/72; 17%) of genes that are potential targets of miRNAs decreased in <i>DGCR8</i> haploinsufficient mice (78)                                                                                                      |                                                                                                                                   |                                                                                                                                                | Decrease in miRNA biogenesis in PFC and hippocampus; reduced dendritic complexity and impaired PPI (52); Increased LTP in mature mice (79); Abnormalities in dendritic spines and structural alterations in the hippocampus (80); Reduced cell proliferation and neurogenesis in adult hippocampus & impaired hippocampal-dependent learning, which could be rescued by IGF2 (81) |
| Epistasis                     | <i>COMT/PRODH</i>         | Significant interaction between <i>COMT</i> genotype and proline level, with significantly decreased SPEM performance in children with high plasma proline levels and the low-activity <i>COMT</i> (Met) allele (82); Interaction between high plasma protein levels and <i>COMT</i> genotype on visual processing deficits (83) | Hyperprolinemic 22q11DS subjects with SNP rs4680 low-activity allele (Met) allele at increased risk for psychosis (OR = 2.8) (65) | Increased WM density in left IFL in patients with <i>COMT</i> high-activity (Val) allele and with one or two mutated <i>PRODH</i> alleles (84) | Epistatic interaction between <i>Prodh</i> and <i>Comt</i> at the level of transcription and behavior; <i>Prodh</i> -deficient mice show increased neurotransmitter release at glutamatergic synapses, upregulation of <i>Comt</i> mRNA in the PFC, associative learning deficits and increased sensitivity to psychomimetic drugs (85)                                           |

ADHD, attention-deficit/hyperactivity disorder; BPRS, Brief Psychiatric Rating Scale; DA, dopamine; DLPFC, dorsolateral prefrontal cortex; IFL, inferior frontal lobe; LTP, long term potentiation; miRNA, microRNA; OCD, obsessive-compulsive disorder; OR, odds ratio; PFC, prefrontal cortex; PPI, prepulse inhibition; SNP, single nucleotide polymorphism; SPEM, smooth pursuit eye movement; WM, white matter.

## Supplemental References

1. Gennery AR (2011): Immunological aspects of 22q11.2 deletion syndrome. *Cell Mol Life Sci* 69: 17–27.
2. Sebat J, Levy DL, McCarthy SE (2009): Rare structural variants in schizophrenia: one disorder, multiple mutations; one mutation, multiple disorders. *Trends in Genetics* 25: 528–535.
3. Sullivan KE, Jawad AF, Randall P, Driscoll DA, Emanuel BS, McDonald-McGinn DM, Zackai EH (1998): Lack of correlation between impaired T cell production, immunodeficiency, and other phenotypic features in chromosome 22q11.2 deletion syndromes. *Clin Immunol Immunopathol* 86: 141–146.
4. Saxena V, Ramdas S, Ochoa CR, Wallace D, Bhide P, Kohane I (2012): Structural, genetic, and functional signatures of disordered neuro-immunological development in autism spectrum disorder. *PLoS One* 7: e48835.
5. Voineagu I, Wang X, Johnston P, Lowe JK, Tian Y, Horvath S, *et al.* (2011): Transcriptomic analysis of autistic brain reveals convergent molecular pathology. *Nature* 474: 380–384.
6. Beumer W, Gibney SM, Drexhage RC, Pont-Lezica L, Doorduyn J, Klein HC, *et al.* (2012): The immune theory of psychiatric diseases: a key role for activated microglia and circulating monocytes. *J Leukoc Biol* 92: 959–975.
7. Gibney SM, Drexhage HA (2013): Evidence for a dysregulated immune system in the etiology of psychiatric disorders. *J Neuroimmune Pharmacol*. doi: 10.1007/s11481-013-9462-8.
8. Kayser MS, Dalmau J (2011): The emerging link between autoimmune disorders and neuropsychiatric disease. *J Neuropsychiatry Clin Neurosci* 23: 90–97.
9. Chew L-J, Fusar-Poli P, Schmitz T (2013): Oligodendroglial alterations and the role of microglia in white matter injury: relevance to schizophrenia. *Dev Neurosci*. doi: 10.1159/000346157.
10. Brown AS, Begg MD, Gravenstein S, Schaefer CA, Wyatt RJ, Bresnahan M, *et al.* (2004): Serologic evidence of prenatal influenza in the etiology of schizophrenia. *Arch Gen Psychiatry* 61: 774–780.
11. Irish Schizophrenia Genomics Consortium and the Wellcome Trust Case Control Consortium 2 (2012): Genome-wide association study implicates HLA-C\*01:02 as a risk factor at the major histocompatibility complex locus in schizophrenia. *Biol Psychiatry* 72: 620–628.
12. Baker K, Vorstman J (2012): Is there a core neuropsychiatric phenotype in 22q11.2 deletion syndrome? *Curr Opin Neurol* 25: 131–137.
13. Antshel KM, Shprintzen R, Fremont W, Higgins AM, Faraone SV, Kates WR (2010): Cognitive and psychiatric predictors to psychosis in velocardiofacial syndrome: a 3-year follow-up study. *J Am Acad Child Adolesc Psychiatry* 49: 333–344.
14. Rockers K, Ousley O, Sutton T, Schoenberg E, Coleman K, Walker E, Cubells JF (2009): Performance on the Modified Card Sorting Test and its relation to psychopathology in adolescents and young adults with 22q11.2 deletion syndrome. *J Intellect Disabil Res* 53: 665–676.
15. Jalbrzikowski M, Carter C, Senturk D, Chow C, Hopkins JM, Green MF, *et al.* (2012): Social cognition in 22q11.2 microdeletion syndrome: Relevance to psychosis? *Schizophr Res* 142:99-107.
16. Goldenberg PC, Calkins ME, Richard J, McDonald-McGinn D, Zackai E, Mitra N, *et al.* (2011): Computerized neurocognitive profile in young people with 22q11.2 deletion

- syndrome compared to youths with schizophrenia and at-risk for psychosis. *Am J Med Genet* 159B: 87–93.
17. Karayiorgou M, Simon TJ, Gogos JA (2010): 22q11.2 microdeletions: linking DNA structural variation to brain dysfunction and schizophrenia. *Nat Rev Neurosci* 11: 402–416
  18. Shapiro DI, Cubells JF, Ousley OY, Rockers K, Walker EF (2011): Prodromal symptoms in adolescents with 22q11.2 deletion syndrome and schizotypal personality disorder. *Schizophr Res* 129: 20–28.
  19. Vorstman J (2012): Expression of autism spectrum and schizophrenia in patients with a 22q11.2 deletion. *Schizophr Res* 1–5.
  20. Kiley-Brabeck K, Sobin C (2006): Social skills and executive function deficits in children with the 22q11 deletion syndrome. *Appl Neuropsychol* 13: 258–268.
  21. Campbell LE, Stevens AF, McCabe K, Cruickshank L, Morris RG, Murphy DGM, Murphy KC (2011): Is theory of mind related to social dysfunction and emotional problems in 22q11.2 deletion syndrome (velo-cardio-facial syndrome)? *J Neurodevelop Disord* 3: 152–161.
  22. Ho JS, Radoeva PD, Jalbrzikowski M, Chow C, Hopkins J, Tran W-C, *et al.* (2012): Deficits in mental state attributions in individuals with 22q11.2 deletion syndrome (velo-cardio-facial syndrome). *Autism Res* 5: 407–418.
  23. Chow EWC, Watson M, Young DA, Bassett AS (2006): Neurocognitive profile in 22q11 deletion syndrome and schizophrenia. *Schizophr Res* 87: 270–278.
  24. Fung WLA, McEvelly R, Fong J, Silversides C, Chow E, Bassett A (2010): Elevated prevalence of generalized anxiety disorder in adults with 22q11.2 deletion syndrome. *Am J Psychiatry* 167: 997–998.
  25. Green T, Gothelf D, Glaser B, Debbané M, Frisch A, Kotler M, *et al.* (2009): Psychiatric disorders and intellectual functioning throughout development in velocardiofacial (22q11.2 deletion) syndrome. *J Am Acad Child Adolesc Psychiatry* 48: 1060–1068.
  26. Gothelf D, Feinstein C, Thompson T, Gu E, Penniman L, Van Stone E, *et al.* (2007): Risk factors for the emergence of psychotic disorders in adolescents with 22q11.2 deletion syndrome. *Am J Psychiatry* 164: 663–669.
  27. Debbané M, Glaser B, David MK, Feinstein C, Eliez S (2006): Psychotic symptoms in children and adolescents with 22q11.2 deletion syndrome: Neuropsychological and behavioral implications. *Schizophr Res* 84: 187–193.
  28. Dufour F, Schaer M, Debbané M, Farhoumand R, Glaser B, Eliez S (2008): Cingulate gyrus reductions are related to low executive functioning and psychotic symptoms in 22q11.2 deletion syndrome. *Neuropsychologia* 46: 2986–2992.
  29. Beaton EA, Simon TJ (2011): How might stress contribute to increased risk for schizophrenia in children with chromosome 22q11.2 deletion syndrome? *J Neurodevelop Disord* 3: 68–75.
  30. Kates WR, Antshel KM, Faraone SV, Fremont WP, Higgins AM, Shprintzen RJ, *et al.* (2011): Neuroanatomic predictors to prodromal psychosis in velocardiofacial syndrome (22q11.2 deletion syndrome): a longitudinal study. *Biol Psychiatry* 69:945–952.
  31. Duijff SN, Klaassen PWJ, de Veye HFNS, Beemer FA, Sinnema G, Vorstman JAS (2012): Cognitive development in children with 22q11.2 deletion syndrome. *Br J Psychiatry* 200: 462–468.
  32. Reichenberg A, Caspi A, Harrington H, Houts R, Keefe RSE, Murray RM, *et al.* (2010): Static and dynamic cognitive deficits in childhood preceding adult schizophrenia: a 30-year

- study. *Am J Psychiatry* 167: 160–169.
33. Hiroi N, Hiramoto T, Harper KM, Suzuki G, Boku AS (2012): Mouse models of 22q11.2-associated autism spectrum disorder. *Autism* 1–9.
  34. Weinberger DR, Egan MF, Bertolino A, Callicott JH, Mattay VS, Lipska BK, *et al.* (2001): Prefrontal neurons and the genetics of schizophrenia. *Biol Psychiatry* 50: 825–844.
  35. Shaikh TH, Kurahashi H, Saitta SC, O'Hare AM, Hu P, Roe BA, *et al.* (2000): Chromosome 22-specific low copy repeats and the 22q11.2 deletion syndrome: genomic organization and deletion endpoint analysis. *Hum Mol Genet* 9: 489–501.
  36. Emanuel BS (2008): Molecular mechanisms and diagnosis of chromosome 22q11.2 rearrangements. *Dev Disabil Res Revs* 14: 11–18.
  37. Amati F, Conti E, Novelli A, Bengala M, Diglio MC, Marino B, *et al.* (1999): Atypical deletions suggest five 22q11.2 critical regions related to the DiGeorge/velo-cardio-facial syndrome. *Eur J Hum Genet* 7: 903–909.
  38. Saitta SC, McGrath JM, Mensch H, Shaikh TH, Zackai EH, Emanuel BS (1999): A 22q11.2 deletion that excludes UFD1L and CDC45L in a patient with conotruncal and craniofacial defects. *Am J Hum Genet* 65: 562–566.
  39. Shaikh TH, O'Connor RJ, Pierpont ME, McGrath J, Hacker AM, Nimmakayalu M, *et al.* (2007): Low copy repeats mediate distal chromosome 22q11.2 deletions: Sequence analysis predicts breakpoint mechanisms. *Genome Res* 17: 482–491.
  40. Yagi H, Furutani Y, Hamada H, Sasaki T, Asakawa S, Minoshima S, *et al.* (2003): Role of TBX1 in human del22q11.2 syndrome. *Lancet* 362: 1366–1373.
  41. Kempf L, Nicodemus KK, Kolachana B, Vakkalanka R, Verchinski BA, Egan MF, *et al.* (2008): Functional polymorphisms in PRODH are associated with risk and protection for schizophrenia and fronto-striatal structure and function. *PLoS Genet* 4: e1000252.
  42. Edelmann L, Pandita RK, Spiteri E, Funke B, Goldberg R, Palanisamy N, *et al.* (1999): A common molecular basis for rearrangement disorders on chromosome 22q11. *Hum Mol Genet* 8: 1157–1167.
  43. PortnoI M-F (2009): Microduplication 22q11.2: A new chromosomal syndrome. *Eur J Med Genet* 52: 88–93.
  44. Ou Z, Berg JS, Yonath H, Enciso VB, Miller DT, Picker J, *et al.* (2008): Microduplications of 22q11.2 are frequently inherited and are associated with variable phenotypes. *Genet Med* 10: 267–277.
  45. Turner DJ, Miretti M, Rajan D, Fiegler H, Carter NP, Blayney ML, *et al.* (2008): Germline rates of de novo meiotic deletions and duplications causing several genomic disorders. *Nat Genet* 40: 90–95.
  46. Yobb TM, Somerville MJ, Willatt L, Firth HV, Harrison K, MacKenzie J, *et al.* (2005): Microduplication and triplication of 22q11.2: a highly variable syndrome. *Am J Hum Genet* 76: 865–876.
  47. Liao J (2004): Full spectrum of malformations in velo-cardio-facial syndrome/DiGeorge syndrome mouse models by altering Tbx1 dosage. *Hum Mol Genet* 13: 1577–1585.
  48. Ensenuer RE, Adeyinka A, Flynn HC, Michels VV, Lindor NM, Dawson DB, *et al.* (2003): Microduplication 22q11.2, an emerging syndrome: clinical, cytogenetic, and molecular analysis of thirteen patients. *Am J Hum Genet* 73: 1027–1040.
  49. Mukaddes NM, Herguner S (2007): Autistic disorder and 22q11.2 duplication. *World J Biol Psychiatry* 8: 127–130.
  50. Brunetti-Pierri N, Berg JS, Scaglia F, Belmont J, Bacino CA, Sahoo T, *et al.* (2008):

- Recurrent reciprocal 1q21.1 deletions and duplications associated with microcephaly or macrocephaly and developmental and behavioral abnormalities. *Nat Genet* 40: 1466–1471.
51. Long JM, LaPorte P, Merscher S, Funke B, Saint-Jore B, Puech A, *et al.* (2006): Behavior of mice with mutations in the conserved region deleted in velocardiofacial/DiGeorge syndrome. *Neurogenetics* 7: 247–257.
  52. Stark KL, Xu B, Bagchi A, Lai W-S, Liu H, Hsu R, *et al.* (2008): Altered brain microRNA biogenesis contributes to phenotypic deficits in a 22q11-deletion mouse model. *Nat Genet* 40: 751–760.
  53. van Amelsvoort T, Zinkstok J, Figeo M, Daly E, Morris R, Owen MJ, *et al.* (2007): Effects of a functional COMT polymorphism on brain anatomy and cognitive function in adults with velo-cardio-facial syndrome. *Psychol Med* 38: 89–100.
  54. Gothelf D, Eliez S, Thompson T, Hinard C, Penniman L, Feinstein C, *et al.* (2005): COMT genotype predicts longitudinal cognitive decline and psychosis in 22q11.2 deletion syndrome. *Nat Neurosci* 8: 1500–1502.
  55. Bearden CE, Jawad AF, Lynch DR, Sokol S, Kaner SJ, McDonald-McGinn DM, *et al.* (2004): Effects of a functional COMT polymorphism on prefrontal cognitive function in patients with 22q11.2 deletion syndrome. *Am J Psychiatry* 161: 1700–1702.
  56. Shashi V, Keshavan M, Howard T, Berry M, Basehore M, Lewandowski E, Kwapil T (2006): Cognitive correlates of a functional COMT polymorphism in children with 22q11.2 deletion syndrome. *Clin Genet* 69: 234–238.
  57. Murphy KC, Jones LA, Owen MJ (1999): High rates of schizophrenia in adults with velocardio-facial syndrome. *Arch Gen Psychiatry* 56: 940–945.
  58. Gothelf D, Michaelovsky E, Frisch A (2007): Association of the low-activity COMT 158Met allele with ADHD and OCD in subjects with velocardiofacial syndrome. *Int J Neuropsychopharmacol* 10: 301–308.
  59. Egan MF, Goldberg TE, Kolachana BS, Callicott JH, Mazzanti CM, Straub RE, *et al.* (2001): Effect of COMT Val108/158 Met genotype on frontal lobe function and risk for schizophrenia. *Proc Natl Acad Sci USA* 98: 6917–6922.
  60. Tovilla-Zárate C, Medellín BC, Fresán A, López-Narváez L, Castro TBG, Juárez Rojop I, *et al.* (2012): No association between catechol-o-methyltransferase Val108/158Met polymorphism and schizophrenia or its clinical symptomatology in a Mexican population. *Mol Biol Rep* 40: 2053–2058.
  61. Halleland H, Lundervold AJ, Halmøy A, Haavik J, Johansson S (2009): Association between Catechol O-methyltransferase (COMT) haplotypes and severity of hyperactivity symptoms in Adults. *Am J Med Genet* 150B: 403–410.
  62. Reuter M, Kirsch P, Hennig J (2005): Inferring candidate genes for Attention Deficit Hyperactivity Disorder (ADHD) assessed by the World Health Organization Adult ADHD Self-Report Scale (ASRS). *J Neural Transm* 113: 929–938.
  63. Karayiorgou M, Altemus M, Galke BL, Goldman D, Murphy DL, Ott J, Gogos JA (1997): Genotype determining low catechol-O-methyltransferase activity as a risk factor for obsessive-compulsive disorder. *Proc Natl Acad Sci U S A* 94: 4572–4575.
  64. Gogos JA, Morgan M, Luine V, Santha M, Ogawa S, Pfaff D, Karayiorgou M (1998): Catechol-O-methyltransferase-deficient mice exhibit sexually dimorphic changes in catecholamine levels and behavior. *Proc Natl Acad Sci USA* 95: 9991–9996.
  65. Raux G, Bumsel E, Hecketsweiler B, van Amelsvoort T, Zinkstok J, Manouvrier-Hanu S, *et al.* (2006): Involvement of hyperprolinemia in cognitive and psychiatric features of the

- 22q11 deletion syndrome. *Hum Mol Genet* 16: 83–91.
66. Li T, Ma X, Sham PC, Sun X, Hu X, Wang Q, *et al.* (2004): Evidence for association between novel polymorphisms in the PRODH gene and schizophrenia in a Chinese population. *Am J Med Genet* 129B: 13–15.
  67. Stark KL, Burt RA, Gogos JA, Karayiorgou M (2009): Analysis of prepulse inhibition in mouse lines overexpressing 22q11.2 orthologues. *Int J Neuropsychopharm* 12: 983.
  68. Vorstman J, Chow EW, Ophoff RA, van Engeland H, Beemer F, Kahn RS, *et al.* (2009): Association of the PIK4CA schizophrenia-susceptibility gene in adults with the 22q11.2 deletion syndrome. *Am J Med Genet* 150B: 430–433.
  69. Jungerius BJ, Hoogendoorn MLC, Bakker SC, Van't Slot R, Bardoel AF, Ophoff RA, *et al.* (2008): An association screen of myelin-related genes implicates the chromosome 22q11 PIK4CA gene in schizophrenia. *Mol Psychiatry* 13: 1060–1068.
  70. Ikeda M, Williams N, Williams HJ, Smith R, Monks S, Owen MJ, *et al.* (2010): Failure to confirm association between PIK4CA and psychosis in 22q11.2 deletion syndrome. *Am J Med Genet* 153B: 980–982.
  71. Williams NM, Glaser B, Norton N, Williams H, Pierce T, Moskvina V, *et al.* (2007): Strong evidence that GNB1L is associated with schizophrenia. *Hum Mol Genet* 17: 555–566.
  72. Paylor R, Glaser B, Mupo A, Ataliotis P, Spencer C, Sobotka A, *et al.* (2006): Tbx1 haploinsufficiency is linked to behavioral disorders in mice and humans: implications for 22q11 deletion syndrome. *Proc Natl Acad Sci USA* 103: 7729–7734.
  73. Shifman S, Levit A, Chen M-L, Chen C-H, Bronstein M, Weizman A, *et al.* (2006): A complete genetic association scan of the 22q11 deletion region and functional evidence reveal an association between DGCR2 and schizophrenia. *Hum Genet* 120: 160–170.
  74. Vitelli F, Morishima M, Taddei I, Lindsay EA, Baldini A (2002): Tbx1 mutation causes multiple cardiovascular defects and disrupts neural crest and cranial nerve migratory pathways. *Hum Mol Genet* 11: 915–922.
  75. Ota VK, Gadelha A, Assunção IB, Santoro ML, Christofolini DM, Bellucco FT, *et al.* (2013): ZDHHC8 gene may play a role in cortical volumes of patients with schizophrenia. *Schizophr Res* 145: 33–35.
  76. Chen W-Y, Shi Y-Y, Zheng Y-L, Zhao X-Z, Zhang G-J, Chen S-Q, *et al.* (2004): Case-control study and transmission disequilibrium test provide consistent evidence for association between schizophrenia and genetic variation in the 22q11 gene ZDHHC8. *Hum Mol Genet* 13: 2991–2995.
  77. Mukai J, Dhillon A, Drew LJ, Stark KL, Cao L, Macdermott AB, *et al.* (2008): Palmitoylation-dependent neurodevelopmental deficits in a mouse model of 22q11 microdeletion. *Nat Neurosci* 11: 1302–1310.
  78. Brzustowicz LM, Bassett AS (2012): miRNA-mediated risk for schizophrenia in 22q11.2 deletion syndrome. *Front Genet* 3:291.
  79. Earls LR, Fricke RG, Yu J, Berry RB, Baldwin LT, Zakharenko SS (2012): Age-dependent microRNA control of synaptic plasticity in 22q11 deletion syndrome and schizophrenia. *J Neurosci* 32: 14132–14144.
  80. Bin Xu, Hsu P-K, Stark KL, Karayiorgou M, Gogos JA (2013): Derepression of a neuronal inhibitor due to miRNA dysregulation in a schizophrenia-related microdeletion. *Cell* 152: 262–275.
  81. Ouchi Y, Banno Y, Shimizu Y, Ando S, Hasegawa H, Adachi K, Iwamoto T (2013): Reduced adult hippocampal neurogenesis and working memory deficits in the dgcr8-



- deficient mouse model of 22q11.2 deletion-associated schizophrenia can be rescued by IGF2. *J Neurosci* 33: 9408–9419.
82. Vorstman J, Turetsky BI, Sijmens-Morcus MEJ, de Sain MG, Dorland B, Sprong M, *et al.* (2009): Proline affects brain function in 22q11DS children with the low activity COMT 158 allele. *Neuropsychopharmacology* 34: 739–746.
  83. Magnée MJCM, Lamme VAF, de Sain-van der Velden MGM, Vorstman JAS, Kemner C (2011): Proline and COMT status affect visual connectivity in children with 22q11.2 deletion syndrome. *PLoS One* 6: e25882.
  84. Zinkstok J, Schmitz N, van Amelsvoort T, Moeton M, Baas F, Linszen D (2007): Genetic variation in COMT and PRODH is associated with brain anatomy in patients with schizophrenia. *Genes Brain Behav* 7: 61–69.
  86. Paterlini M, Zakharenko SS, Lai W-S, Qin J, Zhang H, Mukai J, *et al.* (2005): Transcriptional and behavioral interaction between 22q11.2 orthologs modulates schizophrenia-related phenotypes in mice. *Nat Neurosci* 8: 1586–1594.
